# Supplementary material for: Competition between drum and quasi-planar structures in RhB18 –: motifs for metallo-boronanotubes and metallo-borophenes
Source: PubMed Central journal article supplement (PMC5355831; doi:10.1039/c6sc02623k), 2016-07-25
Supplement: SC-007-C6SC02623K-s001.pdf [file SC-007-C6SC02623K-s001.pdf]

## SUPPORTING INFORMATION

### Competition between Drum and Quasi-planar Structures in $\text{RhB}_{18}^-$ : Motifs for Metallo-Boronanotubes and Metallo-Borophenes

Tian Jian<sup>1†</sup>, Wan-Lu Li<sup>2†</sup>, Xin Chen<sup>2</sup>, Teng-Teng Chen<sup>1</sup>, Gary V. Lopez<sup>1</sup>,  
Jun Li<sup>2\*</sup>, and Lai-Sheng Wang<sup>1\*</sup>

<sup>1</sup>*Department of Chemistry, Brown University, Providence, Rhode Island 02912 (USA)*

<sup>2</sup>*Department of Chemistry and Key Laboratory of Organic Optoelectronics & Molecular Engineering  
of Ministry of Education, Tsinghua University, Beijing 100084 (China)*

\*E-mail: junli@tsinghua.edu.cn; Lai-Sheng\_Wang@brown.edu

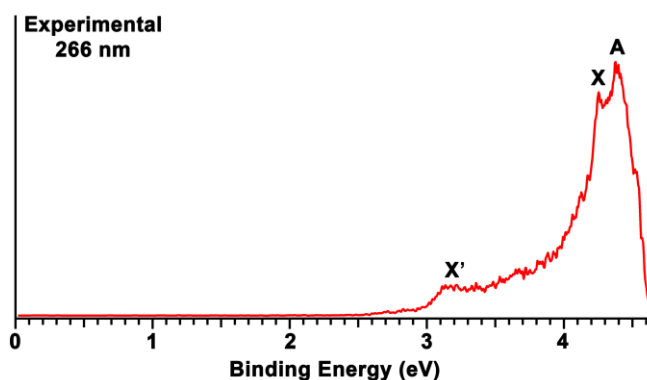

**Figure S1.** The photoelectron spectrum of  $\text{RhB}_{18}^-$  at 266 nm (4.661 eV).

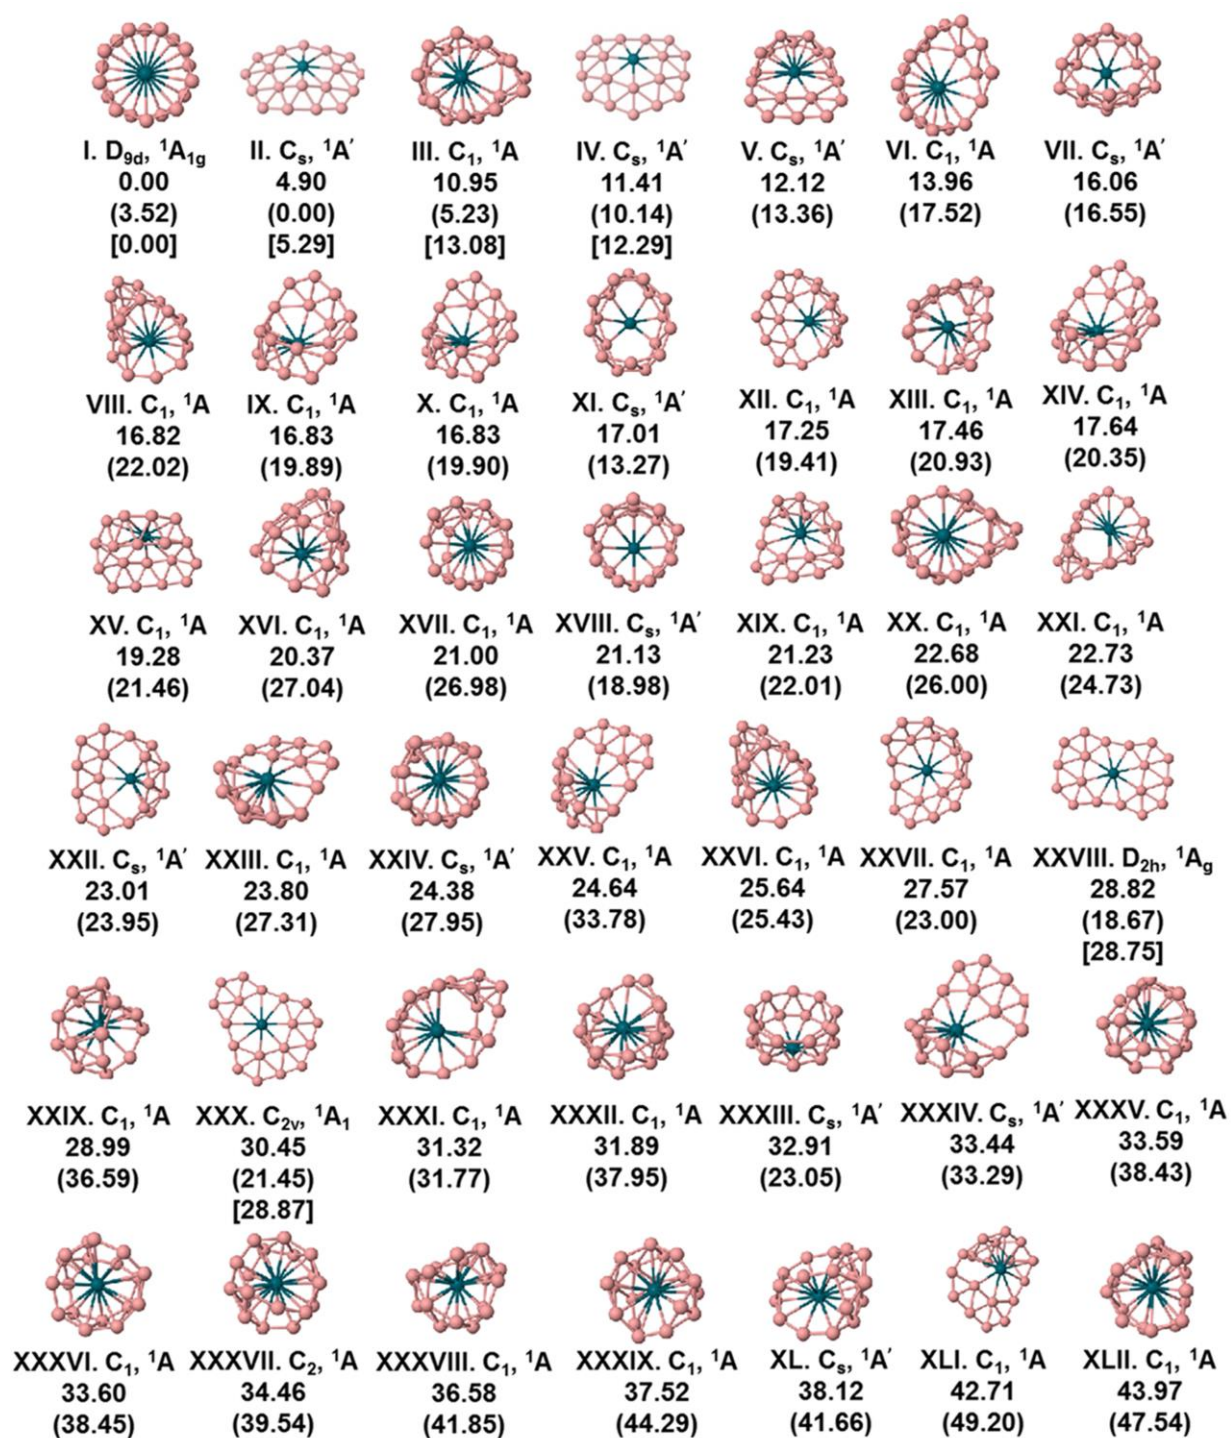

**Figure S2.** Relative energies in kcal/mol of the low-lying isomers of RhB<sub>18</sub><sup>-</sup> within 45.0 kcal/mol at PBE0/TZP, PBE/TZP in brackets and CCSD(T) levels in square brackets.

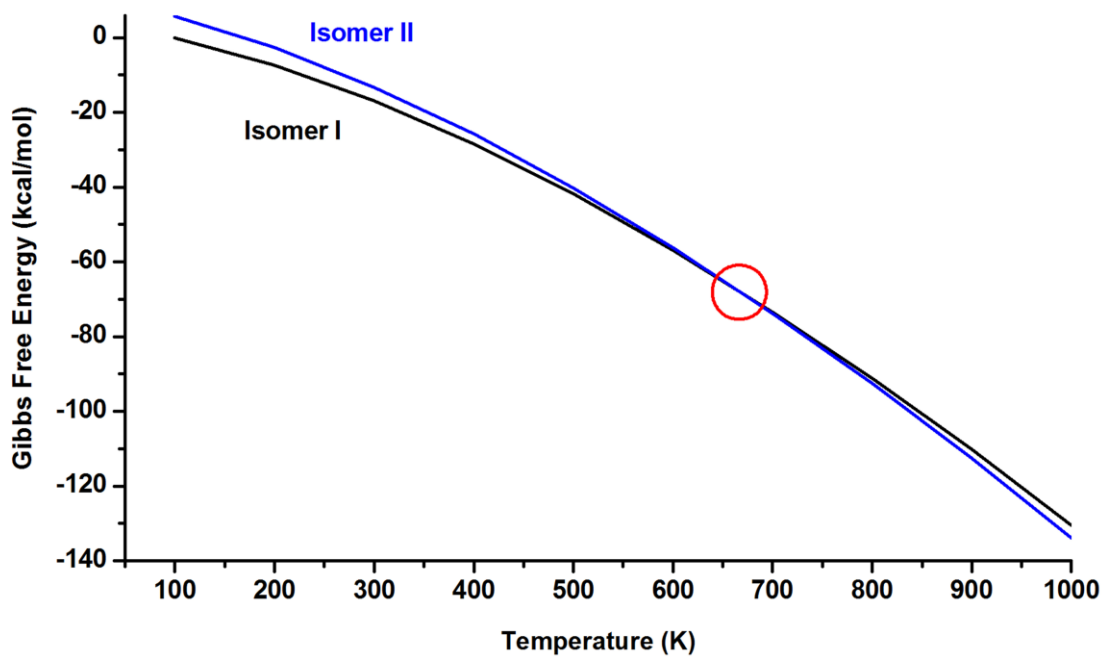

**Figure S3.** Relative Gibbs free energies (kcal/mol) of the *drum* isomer I and *quasi-planar* isomer II of  $\text{RhB}_{18}^-$  in the temperature range from 100 to 1000 K at the PBE0/B/cc-pVTZ/Rh/ECP10MDF\_VTZ level of theory. Note that the two isomers are nearly degenerate within a wide range of temperature; while PBE0 and CCSD(T) calculations predict that the isomer I is slightly more stable than isomer I, PBE ones predict the opposite.

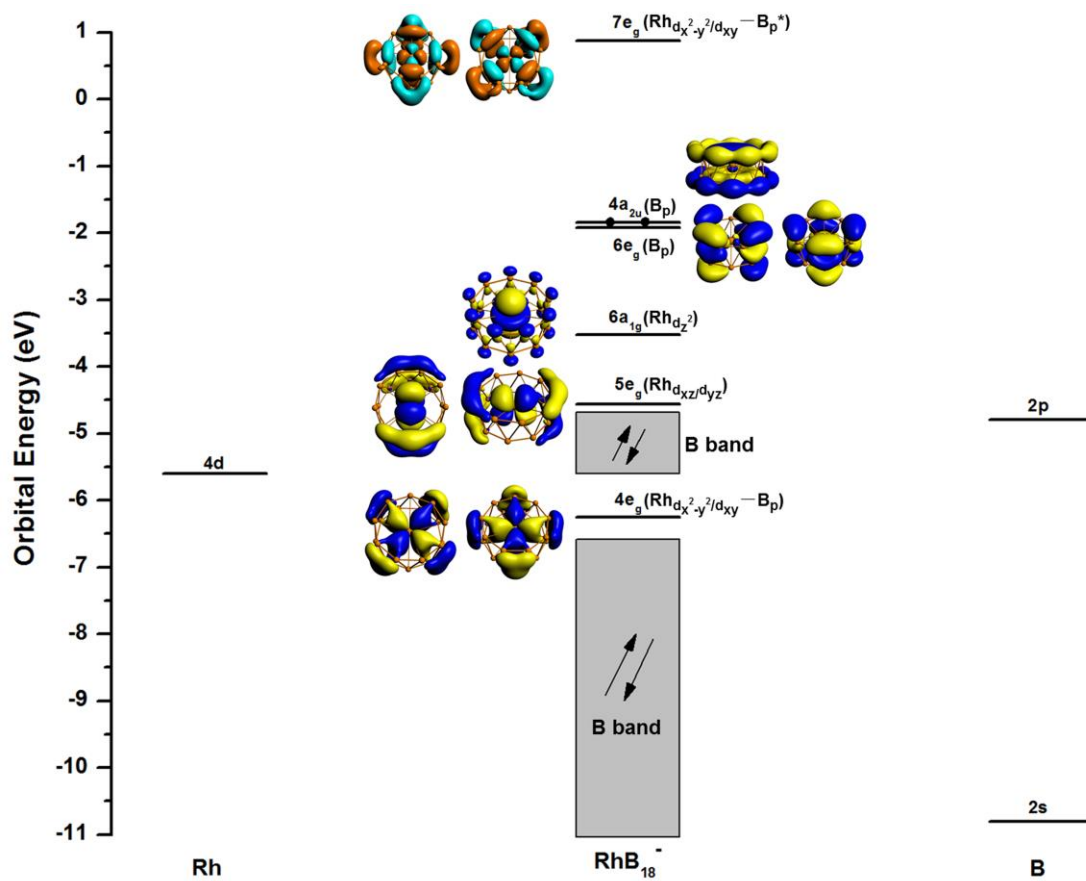

**Figure S4.** Kohn-Sham molecular orbital energy levels for the drum isomer of  $\text{RhB}_{18}^-$  with selected molecular orbital contours.

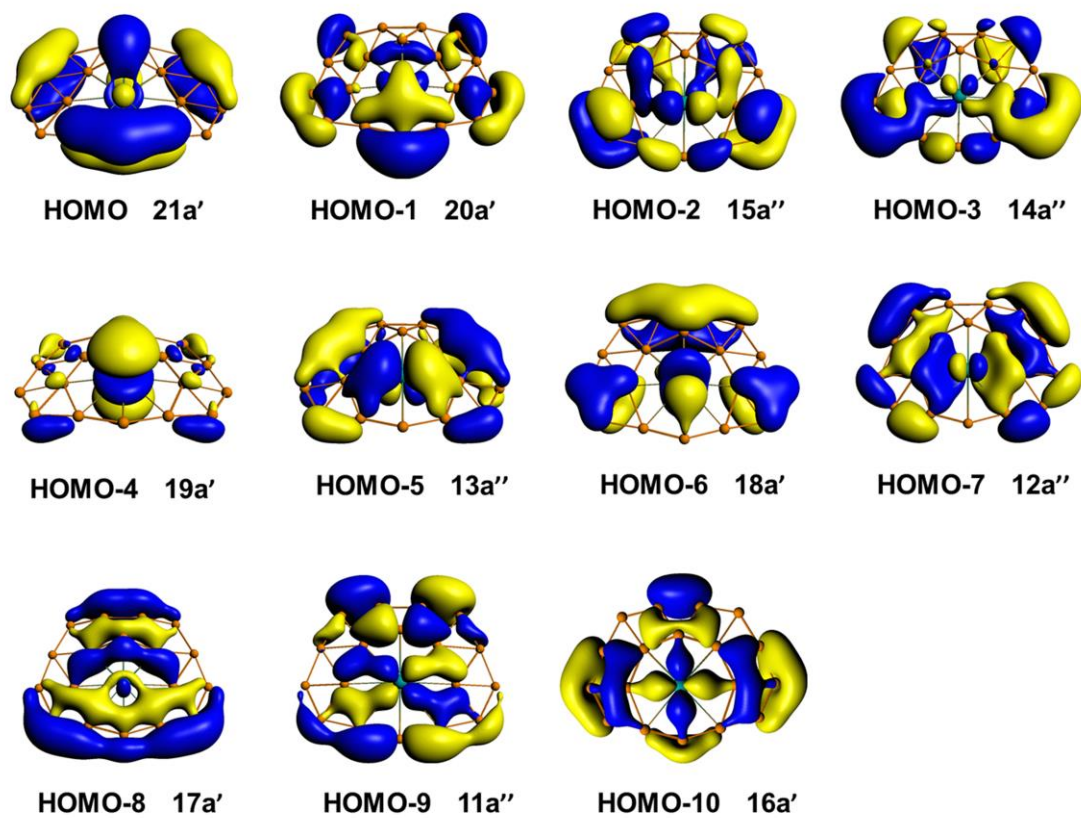

**Figure S5.** Valence Kohn-Sham molecular orbital contours for the quasi-planar isomer of  $\text{RhB}_{18}^-$ .

**Table S1.** Cartesian coordinates of the  $D_{9d}$  drum and  $C_s$  quasi-planar isomers of  $RhB_{18}^-$  at the PBE0/TZP level of theory.

**$D_{9d}$  drum isomer:**

|      |           |           |           |
|------|-----------|-----------|-----------|
| 1.Rh | 0.000000  | 0.000000  | 0.000000  |
| 2.B  | 0.000000  | 2.322405  | 0.827886  |
| 3.B  | 1.492892  | 1.779109  | 0.827806  |
| 4.B  | -1.492892 | -1.779109 | -0.827806 |
| 5.B  | 0.000000  | -2.322405 | -0.827886 |
| 6.B  | 2.287200  | 0.403328  | 0.827806  |
| 7.B  | 1.492892  | -1.779109 | -0.827806 |
| 8.B  | -2.287200 | -0.403328 | -0.827806 |
| 9.B  | 2.287200  | -0.403328 | -0.827806 |
| 10.B | -1.492892 | 1.779109  | 0.827806  |
| 11.B | 2.011262  | -1.161203 | 0.827886  |
| 12.B | -0.794308 | -2.182437 | 0.827806  |
| 13.B | 0.794308  | -2.182437 | 0.827806  |
| 14.B | -2.011262 | 1.161203  | -0.827886 |
| 15.B | 0.794308  | 2.182437  | -0.827806 |
| 16.B | -0.794308 | 2.182437  | -0.827806 |
| 17.B | 2.011262  | 1.161203  | -0.827886 |
| 18.B | -2.287200 | 0.403328  | 0.827806  |
| 19.B | -2.011262 | -1.161203 | 0.827886  |

**$C_s$  quasi-planar isomer:**

|      |           |           |           |
|------|-----------|-----------|-----------|
| 1.Rh | -0.272015 | 0.450139  | 0.000000  |
| 2.B  | 0.012811  | 0.464003  | -2.164864 |
| 3.B  | 0.117565  | 2.172161  | -1.523826 |
| 4.B  | 0.054250  | 2.600605  | 0.000000  |
| 5.B  | 0.012811  | 0.464003  | 2.164864  |
| 6.B  | -0.045689 | -1.100916 | 1.461179  |
| 7.B  | 0.035083  | -2.740446 | 0.861958  |
| 8.B  | -0.726098 | -1.508452 | 0.000000  |
| 9.B  | -0.045689 | -1.100916 | -1.461179 |
| 10.B | 0.480422  | 0.410499  | -3.767007 |
| 11.B | 0.382113  | 1.784396  | 3.076109  |
| 12.B | 0.337400  | -1.090381 | 3.189937  |
| 13.B | 0.295152  | -2.469353 | -2.404338 |
| 14.B | 0.337400  | -1.090381 | -3.189937 |
| 15.B | 0.480422  | 0.410499  | 3.767007  |
| 16.B | 0.382113  | 1.784396  | -3.076109 |
| 17.B | 0.117565  | 2.172161  | 1.523826  |
| 18.B | 0.295152  | -2.469353 | 2.404338  |
| 19.B | 0.035083  | -2.740446 | -0.861958 |
